# Supplementary material
Source: PubMed Central journal article supplement (PMC8366260)
Supplement: sj-pdf-2-vdi-10.1177_10406387211027131.pdf [file sj-pdf-2-vdi-10.1177_10406387211027131.pdf]

**Supplemental Table 2.** Reference genomes and identity scores of the pairwise comparison analysis for family *Gemoviridae*.

| Genus                    | Species                                         | Virus                                                                                         | Abbreviation in Fig. 2 | Accession | Pairwise identity scores to BuGyKV |
|--------------------------|-------------------------------------------------|-----------------------------------------------------------------------------------------------|------------------------|-----------|------------------------------------|
| <i>Gemycircularvirus</i> | <i>Blackbird associated gemycircularvirus 1</i> | Faecal-associated gemycircularvirus 1c, complete genome                                       | GCiV Bb-1              | KF371641  | 58.401                             |
| <i>Gemycircularvirus</i> | <i>Bovine associated gemycircularvirus 1</i>    | Faeces associated gemycircularvirus 22 isolate 52_Fec78023_cow, complete sequence             | GCiV Bo-1              | KT862253  | 56.601                             |
| <i>Gemycircularvirus</i> | <i>Bromus associated gemycircularvirus 1</i>    | Bromus-associated circular DNA virus 3 isolate BasCV-3_NZ-NZG01_Sef-2012, complete genome     | GCiV Br-1              | KM510192  | 57.701                             |
| <i>Gemycircularvirus</i> | <i>Cassava associated gemycircularvirus 1</i>   | Cassava associated gemycircularvirus 1 isolate G14, complete genome                           | GCiV Cs-1              | JQ412056  | 57.301                             |
| <i>Gemycircularvirus</i> | <i>Chickadee associated gemycircularvirus 1</i> | Poecile atricapillus GI tract-associated gemycircularvirus isolate 254065908, complete genome | GCiV Ce-1              | KT309029  | 56.401                             |
| <i>Gemycircularvirus</i> | <i>Chicken associated gemycircularvirus 1</i>   | Faeces associated gemycircularvirus 20 isolate 27_Fec79971_chicken, complete sequence         | GCiV Ch-1              | KT862243  | 58.601                             |
| <i>Gemycircularvirus</i> | <i>Chicken associated gemycircularvirus 2</i>   | Faeces associated gemycircularvirus 17 isolate 27_Fec16497_chicken, complete sequence         | GCiV Ch-2              | KT862242  | 58.501                             |
| <i>Gemycircularvirus</i> | <i>Dragonfly associated gemycircularvirus 1</i> | Dragonfly-associated circular virus 2 isolate FL2-5X-2010, complete genome                    | GCiV Df-1              | JX185429  | 58.701                             |
| <i>Gemycircularvirus</i> | <i>Equine associated gemycircularvirus 1</i>    | Faeces associated gemycircularvirus 18 isolate 30_Fec80061_horse, complete sequence           | GCiV Eq-1              | KT862248  | 57.001                             |
| <i>Gemycircularvirus</i> | <i>Fur seal associated gemycircularvirus 1</i>  | Faecal-associated gemycircularvirus 4, complete genome                                        | GCiV Pho-1             | KF371638  | 59.501                             |
| <i>Gemycircularvirus</i> | <i>Gerygone associated gemycircularvirus 1</i>  | Faecal-associated gemycircularvirus 6, complete genome                                        | GCiV Gy-1              | KF371636  | 55.701                             |
| <i>Gemycircularvirus</i> | <i>Gerygone associated gemycircularvirus 2</i>  | Faecal-associated gemycircularvirus 5, complete genome                                        | GCiV Gy-2              | KF371637  | 56.801                             |

Viruses shared between water buffaloes and small ruminants

|                          |                                                   |                                                                                                 |           |          |        |
|--------------------------|---------------------------------------------------|-------------------------------------------------------------------------------------------------|-----------|----------|--------|
| <i>Gemycircularvirus</i> | <i>Gerygone associated gemycircularvirus 3</i>    | Faecal-associated gemycircularvirus 3, complete genome                                          | GCiV Gy-3 | KF371639 | 59.201 |
| <i>Gemycircularvirus</i> | <i>Hypericum associated gemycircularvirus 1</i>   | Hypericum japonicum associated circular DNA virus isolate VNHJ1W, complete genome               | GCiV Hy-1 | KF413620 | 58.101 |
| <i>Gemycircularvirus</i> | <i>Lama associated gemycircularvirus 1</i>        | Faeces associated gemycircularvirus 21 isolate 29_Fec80018_llama, complete sequence             | GCiV LI-1 | KT862245 | 58.201 |
| <i>Gemycircularvirus</i> | <i>Mallard associated gemycircularvirus 1</i>     | Faecal-associated gemycircularvirus 7, complete genome                                          | GCiV Du-1 | KF371635 | 58.501 |
| <i>Gemycircularvirus</i> | <i>Miniopterus associated gemycircularvirus 1</i> | Miniopterus associated gemycircularvirus 1 isolate BtMf-CV-23/GD2012, complete genome           | GCiV Mi-1 | KJ641719 | 60.901 |
| <i>Gemycircularvirus</i> | <i>Mongoose associated gemycircularvirus 1</i>    | Mongoose feces-associated gemycircularvirus d strain 478d, complete genome                      | GCiV Mg-1 | KP263547 | 58.701 |
| <i>Gemycircularvirus</i> | <i>Mosquito associated gemycircularvirus 1</i>    | Mosquito VEM virus SDBVL G, complete genome                                                     | GCiV Mo-1 | HQ335086 | 58.701 |
| <i>Gemycircularvirus</i> | <i>Odonata associated gemycircularvirus 1</i>     | Odonata associated gemycircularvirus-1 isolate OdaGmV-1-US-260BC-12, complete genome            | GCiV Od-1 | KM598385 | 57.601 |
| <i>Gemycircularvirus</i> | <i>Odonata associated gemycircularvirus 2</i>     | Odonata associated gemycircularvirus-2 isolate OdaGmV-2-US-1634LM2-12, complete genome          | GCiV Od-2 | KM598388 | 56.801 |
| <i>Gemycircularvirus</i> | <i>Poaceae associated gemycircularvirus 1</i>     | Poaceae-associated gemycircularvirus 1 isolate PaGmV-1_TO_STO14-29204_2014, complete genome     | GCiV Pc-1 | KT253577 | 59.501 |
| <i>Gemycircularvirus</i> | <i>Porcine associated gemycircularvirus 1</i>     | Faeces associated gemycircularvirus 19 isolate 49_Fec80061_pig, complete sequence               | GCiV Po-1 | KT862250 | 57.901 |
| <i>Gemycircularvirus</i> | <i>Porcine associated gemycircularvirus 2</i>     | Faecal-associated gemycircularvirus 2, complete genome                                          | GCiV Po-2 | KF371640 | 58.801 |
| <i>Gemycircularvirus</i> | <i>Pteropus associated gemycircularvirus 1</i>    | Pacific flying fox faeces associated gemycircularvirus-10 isolate Tbat_45285, complete genome   | GCiV Pt-1 | KT732804 | 57.301 |
| <i>Gemycircularvirus</i> | <i>Pteropus associated gemycircularvirus 2</i>    | Pacific flying fox faeces associated gemycircularvirus-2 isolate Tbat_A_103791, complete genome | GCiV Pt-2 | KT732793 | 57.401 |
| <i>Gemycircularvirus</i> | <i>Pteropus associated gemycircularvirus 3</i>    | Pteropus associated gemycircularvirus 3 isolate Tbat_A_103852, complete genome                  | GCiV Pt-3 | KT732797 | 57.201 |
| <i>Gemycircularvirus</i> | <i>Pteropus associated gemycircularvirus 4</i>    | Pteropus associated gemycircularvirus 4 isolate Tbat_H_103806, complete genome                  | GCiV Pt-4 | KT732814 | 58.501 |
| <i>Gemycircularvirus</i> | <i>Pteropus associated gemycircularvirus 5</i>    | Pacific flying fox faeces associated gemycircularvirus-8 isolate Tbat_H_12377, complete genome  | GCiV Pt-5 | KT732802 | 58.701 |

Viruses shared between water buffaloes and small ruminants

|                          |                                                 |                                                                                                  |            |          |        |
|--------------------------|-------------------------------------------------|--------------------------------------------------------------------------------------------------|------------|----------|--------|
| <i>Gemycircularvirus</i> | <i>Pteropus associated gemycircularvirus 6</i>  | Pacific flying fox faeces associated gemycircularvirus-4 isolate Tbat_H_103639, complete genome  | GCiV Pt-6  | KT732796 | 58.201 |
| <i>Gemycircularvirus</i> | <i>Pteropus associated gemycircularvirus 7</i>  | Pacific flying fox faeces associated gemycircularvirus-11 isolate Tbat_L_103909, complete genome | GCiV Pt-7  | KT732812 | 58.601 |
| <i>Gemycircularvirus</i> | <i>Pteropus associated gemycircularvirus 8</i>  | Pteropus associated gemycircularvirus 8 isolate Tbat_31579, complete genome                      | GCiV Pt-8  | KT732806 | 59.501 |
| <i>Gemycircularvirus</i> | <i>Pteropus associated gemycircularvirus 9</i>  | Pteropus associated gemycircularvirus 9 isolate Tbat_21383, complete genome                      | GCiV Pt-9  | KT732795 | 59.801 |
| <i>Gemycircularvirus</i> | <i>Pteropus associated gemycircularvirus 10</i> | Pteropus associated gemycircularvirus 10 isolate Tbat_H_103958, complete genome                  | GCiV Pt-10 | KT732794 | 56.401 |
| <i>Gemycircularvirus</i> | <i>Rat associated gemycircularvirus 1</i>       | Gemycircularvirus gemy-ch-rat1, complete genome                                                  | GCiV Ra-1  | KR912221 | 58.701 |
| <i>Gemycircularvirus</i> | <i>Sclerotinia gemycircularvirus 1</i>          | Sclerotinia sclerotiorum hypovirulence associated DNA virus 1, complete genome                   | GCiV Sc-1  | GQ365709 | 58.401 |
| <i>Gemycircularvirus</i> | <i>Sewage derived gemycircularvirus 1</i>       | Sewage-associated gemycircularvirus-1 isolate SaGmV-1_NZ-BS3970-2012, complete genome            | GCiV Se-1  | KM821747 | 57.501 |
| <i>Gemycircularvirus</i> | <i>Sewage derived gemycircularvirus 2</i>       | Sewage derived gemycircularvirus 2 isolate BS4117, complete sequence                             | GCiV Se-2  | KJ547641 | 56.601 |
| <i>Gemycircularvirus</i> | <i>Sewage derived gemycircularvirus 3</i>       | Sewage-associated gemycircularvirus-6 isolate BS4014, complete sequence                          | GCiV Se-3  | KJ547636 | 58.501 |
| <i>Gemycircularvirus</i> | <i>Sewage derived gemycircularvirus 4</i>       | Sewage-associated gemycircularvirus-7a isolate BS3939, complete sequence                         | GCiV Se-4  | KJ547637 | 57.801 |
| <i>Gemycircularvirus</i> | <i>Sewage derived gemycircularvirus 5</i>       | Sewage-associated gemycircularvirus-9 isolate BS3970, complete sequence                          | GCiV Se-5  | KJ547639 | 58.701 |
| <i>Gemycircularvirus</i> | <i>Sheep associated gemycircularvirus 1</i>     | Faeces associated gemycircularvirus 16 isolate 47_Fec80064_sheep, complete sequence              | GCiV Ov-1  | KT862249 | 59.901 |
| <i>Gemycircularvirus</i> | <i>Soybean associated gemycircularvirus 1</i>   | Soybean leaf-associated gemycircularvirus 1 strain SlaGemV1-1, complete genome                   | GCiV So-1  | KT598248 | 57.401 |
| <i>Gemyduguivirus</i>    | <i>Dragonfly associated gemyduguivirus 1</i>    | Dragonfly-associated circular virus 3 isolate TO-DFS3B2-2010, complete genome                    | GDV Df-1   | JX185428 | 59.501 |
| <i>Gemygorvirus</i>      | <i>Mallard associated gemygorvirus 1</i>        | Meles meles fecal virus isolate VS4700006, complete genome                                       | GGoV Du-1  | JN704610 | 59.301 |
| <i>Gemygorvirus</i>      | <i>Starling associated gemygorvirus 1</i>       | Faecal-associated gemycircularvirus 10, complete genome                                          | GGoV St-1  | KF371632 | 61.401 |

Viruses shared between water buffaloes and small ruminants

|                      |                                               |                                                                                                 |           |          |        |
|----------------------|-----------------------------------------------|-------------------------------------------------------------------------------------------------|-----------|----------|--------|
| <i>Gemygorvirus</i>  | <i>Sewage derived gemygorvirus 1</i>          | Human genital-associated circular DNA virus-1 isolate 349, complete genome                      | GGoV Se-1 | KJ413144 | 59.101 |
| <i>Gemygorvirus</i>  | <i>Pteropus associated gemygorvirus 1</i>     | Pacific flying fox faeces associated gemycircularvirus-1 isolate Tbat_A_103952, complete genome | GGoV Pt-1 | KT732790 | 59.701 |
| <i>Gemygorvirus</i>  | <i>Canine associated gemygorvirus 1</i>       | Faeces associated gemycircularvirus 15 isolate 53_Fec7_dog, complete sequence                   | GGoV Ca-1 | KT862254 | 58.301 |
| <i>Gemykibivirus</i> | <i>Badger associated gemykibivirus 1</i>      | Badger feces-associated gemycircularvirus strain 588t, complete genome                          | GKiV Ba-1 | KP263543 | 58.301 |
| <i>Gemykibivirus</i> | <i>Black robin associated gemykibivirus 1</i> | Faecal-associated gemycircularvirus 8, complete genome                                          | GKiV BI-1 | KF371634 | 58.501 |
| <i>Gemykibivirus</i> | <i>Blackbird associated gemykibivirus 1</i>   | Faecal-associated gemycircularvirus 9, complete genome                                          | GKiV Bb-1 | KF371633 | 58.601 |
| <i>Gemykibivirus</i> | <i>Bovine associated gemykibivirus 1</i>      | 215 virus complete sequence                                                                     | GKiV Bo-1 | LK931483 | 59.901 |
| <i>Gemykibivirus</i> | <i>Dragonfly associated gemykibivirus 1</i>   | Dragonfly-associated circular virus 1 isolate FL1-2X-2010, complete genome                      | GKiV Df-1 | JX185430 | 59.501 |
| <i>Gemykibivirus</i> | <i>Human associated gemykibivirus 1</i>       | Sewage-associated gemycircularvirus-10a isolate BS3980, complete sequence                       | GKiV Hu-1 | KJ547644 | 58.601 |
| <i>Gemykibivirus</i> | <i>Human associated gemykibivirus 2</i>       | Gemycircularvirus SL1, complete genome                                                          | GKiV Hu-2 | KP133075 | 58.801 |
| <i>Gemykibivirus</i> | <i>Human associated gemykibivirus 3</i>       | Mongoose feces-associated gemycircularvirus c strain 541c, complete genome                      | GKiV Hu-3 | KP263546 | 57.801 |
| <i>Gemykibivirus</i> | <i>Human associated gemykibivirus 4</i>       | Human gemycircularvirus GeTz1, complete genome                                                  | GKiV Hu-4 | KT363839 | 57.001 |
| <i>Gemykibivirus</i> | <i>Human associated gemykibivirus 5</i>       | Gemycircularvirus HV-GeV2, complete genome                                                      | GKiV Hu-5 | KU343137 | 58.701 |
| <i>Gemykibivirus</i> | <i>Mongoose associated gemykibivirus 1</i>    | Mongoose feces-associated gemycircularvirus b strain 160b, complete genome                      | GKiV Mg-1 | KP263545 | 57.501 |
| <i>Gemykibivirus</i> | <i>Pteropus associated gemykibivirus 1</i>    | Pacific flying fox faeces associated gemycircularvirus-12 isolate Tbat_A_64418, complete genome | GKiV Pt-1 | KT732813 | 58.501 |
| <i>Gemykibivirus</i> | <i>Rhinolophus associated gemykibivirus 1</i> | Rhinolophus associated gemykibivirus 1 isolate BtRh-CV-6/Tibet2013, complete genome             | GKiV Rh-1 | KJ641737 | 58.701 |
| <i>Gemykibivirus</i> | <i>Rhinolophus associated gemykibivirus 2</i> | Rhinolophus associated gemykibivirus 2 isolate BtRf-CV-8/NM2013, complete genome                | GKiV Rh-2 | KJ641726 | 59.701 |

Viruses shared between water buffaloes and small ruminants

|                        |                                            |                                                                                                 |           |          |        |
|------------------------|--------------------------------------------|-------------------------------------------------------------------------------------------------|-----------|----------|--------|
| <i>Gemykibivirus</i>   | <i>Sewage derived gemykibivirus 1</i>      | Sewage-associated gemycircularvirus-3 isolate BS4149, complete sequence                         | GKiV Se-1 | KJ547643 | 58.901 |
| <i>Gemykibivirus</i>   | <i>Sewage derived gemykibivirus 2</i>      | Sewage-associated gemycircularvirus-2 isolate BS3911, complete sequence                         | GKiV Se-2 | KJ547642 | 58.601 |
| <i>Gemykolovirus</i>   | <i>Pteropus associated gemykolovirus 1</i> | Pacific flying fox faeces associated gemycircularvirus-6 isolate Tbat_A_103779, complete genome | GKoV Pt-1 | KT732798 | 56.801 |
| <i>Gemykolovirus</i>   | <i>Pteropus associated gemykolovirus 2</i> | Pacific flying fox faeces associated gemycircularvirus-7 isolate Tbat_H_103921, complete genome | GKoV Pt-2 | KT732800 | 59.201 |
| <i>Gemykrogvirus</i>   | <i>Sewage derived gemykrogvirus 1</i>      | Sewage-associated gemycircularvirus-4 isolate BS3913, complete sequence                         | GKgV Se-1 | KJ547634 | 66.901 |
| <i>Gemykrogvirus</i>   | <i>Caribou associated gemykrogvirus 1</i>  | Caribou feces-associated gemycircularvirus, complete genome                                     | GKgV Cb-1 | KJ938717 | 84.301 |
| <i>Gemykrogvirus</i>   | <i>Bovine associated gemykrogvirus 1</i>   | HCBI9.212 virus complete sequence                                                               | GKgV Bo-1 | LK931484 | 76.701 |
| <i>Gemykroznavirus</i> | <i>Rabbit associated gemykroznavirus 1</i> | Faecal-associated gemycircularvirus 11, complete genome                                         | GKaV Rb-1 | KF371631 | 57.201 |
| <i>Gemytondovirus</i>  | <i>Ostrich associated gemytondovirus 1</i> | Faecal-associated gemycircularvirus 12, complete genome                                         | GToV Os-1 | KF371630 | 58.401 |
| <i>Gemyvongvirus</i>   | <i>Human associated gemyvongvirus 1</i>    | Human associated gemyvongvirus 1 isolate DB1, complete genome                                   | GVoV Hu-1 | KP974693 | 58.001 |

**Supplemental Table 3.** Reference genomes and identity scores of the pairwise comparison analysis for subfamily*Gammaherpesvirinae.*

| Genus                    | Species                                 | Virus                                                                                  | Abbreviation in Fig. 3 | Accession   | Pairwise identity scores to: |         |          |          |
|--------------------------|-----------------------------------------|----------------------------------------------------------------------------------------|------------------------|-------------|------------------------------|---------|----------|----------|
|                          |                                         |                                                                                        |                        |             | Buffalo F18                  | Goat S8 | Sheep S4 | Sheep S9 |
| <i>Lymphocryptovirus</i> | <i>Callitrichine gammaherpesvirus 3</i> | Callitrichine herpesvirus 3 strain CJ0149, complete genome                             | LcV CalGHV-3           | NC_004367.1 | 61.701                       | 58.801  | 55.701   | 62.901   |
| <i>Lymphocryptovirus</i> | <i>Human gammaherpesvirus 4</i>         | Human gammaherpesvirus 4, complete genome                                              | LcV HGHV-4             | NC_007605.1 | 60.701                       | 58.901  | 57.701   | 63.901   |
| <i>Lymphocryptovirus</i> | <i>Macacine gammaherpesvirus 4</i>      | Macacine herpesvirus 4, complete genome                                                | LcV McGHV-4            | NC_006146.1 | 59.801                       | 59.801  | 53.401   | 65.901   |
| <i>Lymphocryptovirus</i> | <i>Macacine gammaherpesvirus 10</i>     | Lymphocryptovirus Macaca/pfe-lcl-E3, complete genome                                   | LcV McGHV10            | KP676001.1  | 59.801                       | 58.001  | 57.901   | 65.901   |
| <i>Lymphocryptovirus</i> | <i>Papiine gammaherpesvirus 1</i>       | Cercopithecine herpesvirus 12 DNA polymerase gene, partial cds                         | LcV PaGHV-1            | AF091051.1  | 60.101                       | 61.701  | 60.101   | 61.501   |
| <i>Lymphocryptovirus</i> | <i>Pongine gammaherpesvirus 2</i>       | Pongine herpesvirus 2 DNA polymerase-like gene, partial sequence                       | LcV PoGHV-2            | AY191465.1  | 62.501                       | 55.901  | 57.401   | 59.301   |
| <i>Macavirus</i>         | <i>Alcelaphine gammaherpesvirus 1</i>   | Alcelaphine herpesvirus 1, complete genome                                             | MV AlGHV-1             | NC_002531.1 | 63.101                       | 62.001  | 65.401   | 72.001   |
| <i>Macavirus</i>         | <i>Alcelaphine gammaherpesvirus 2</i>   | Alcelaphine herpesvirus 2 isolate topi-AIHV-2, complete genome                         | MV AlGHV-2             | NC_024382.1 | 63.701                       | 63.201  | 60.601   | 77.601   |
| <i>Macavirus</i>         | <i>Bovine gammaherpesvirus 6</i>        | Bovine herpesvirus 6 isolate Pennsylvania 47, complete genome                          | MV BoGHV-6             | NC_024303.1 | 99.401                       | 92.001  | 78.701   | 58.301   |
| <i>Macavirus</i>         | <i>Caprine gammaherpesvirus 2</i>       | Caprine herpesvirus 2 glycoprotein B (gB) and DNA polymerase (DPOL) genes, partial cds | MV CpGHV-2             | NC_043059.1 | 70.601                       | 65.901  | 64.801   | 71.301   |
| <i>Macavirus</i>         | <i>Hippotragine gammaherpesvirus 1</i>  | Hippotragine herpesvirus 1 DNA polymerase gene, partial cds                            | MV HiGHV-1             | NC_043060.1 | 65.901                       | 65.901  | 64.501   | 65.901   |
| <i>Macavirus</i>         | <i>Ovine gammaherpesvirus 2</i>         | Ovine herpesvirus 2 strain BJ1035, complete genome                                     | MV OvGHV-2             | NC_007646.1 | 60.701                       | 59.201  | 63.101   | 98.301   |

Viruses shared between water buffaloes and small ruminants

|                     |                                          |                                                                                              |              |             |        |        |        |        |
|---------------------|------------------------------------------|----------------------------------------------------------------------------------------------|--------------|-------------|--------|--------|--------|--------|
| <i>Macavirus</i>    | <i>Suid gammaherpesvirus 3</i>           | Porcine lymphotropic herpesvirus long unique region, partial sequence                        | MV SuGHV-3   | NC_038264.1 | 57.201 | 61.301 | 61.201 | 71.601 |
| <i>Macavirus</i>    | <i>Suid gammaherpesvirus 4</i>           | Porcine lymphotropic herpesvirus 2 isolate 568 long unique region, partial sequence          | MV SuGHV-4   | NC_038265.1 | 58.101 | 60.501 | 61.901 | 63.001 |
| <i>Macavirus</i>    | <i>Suid gammaherpesvirus 5</i>           | Porcine lymphotropic herpesvirus 3 isolate 489 long unique region, partial sequence          | MV SuGHV-5   | AY170316.1  | 59.301 | 58.101 | 60.501 | 64.501 |
| <i>Percavirus</i>   | <i>Equid gammaherpesvirus 2</i>          | Equid herpesvirus 2 strain 86/67, complete genome                                            | PV EGHV-2    | NC_001650.2 | 62.101 | 56.601 | 57.201 | 64.501 |
| <i>Percavirus</i>   | <i>Equid gammaherpesvirus 5</i>          | Equid herpesvirus 5 strain 2-141/67, complete genome                                         | PV EGHV-5    | NC_026421.1 | 62.701 | 62.701 | 59.201 | 60.401 |
| <i>Percavirus</i>   | <i>Felid gammaherpesvirus 1</i>          | Felis catus gammaherpesvirus 1 isolate 31286, complete genome                                | PV FeGHV-1   | NC_028099.1 | 58.901 | 59.601 | 61.801 | 58.501 |
| <i>Percavirus</i>   | <i>Mustelid gammaherpesvirus 1</i>       | Badger herpesvirus envelope glycoprotein B (gB) and DNA polymerase (pol) genes, complete cds | PV MusGHV-2  | NC_038266.1 | 57.801 | 56.001 | 56.601 | 55.801 |
| <i>Percavirus</i>   | <i>Phocid gammaherpesvirus 3</i>         | Harp seal herpesvirus isolate FMV04-1493874 DNA polymerase gene, complete cds                | PV PhoGHV-3  | KF466473.1  | 58.801 | 60.001 | 58.401 | 61.201 |
| <i>Percavirus</i>   | <i>Vespertilionid gammaherpesvirus 1</i> | Eptesicus fuscus gammaherpesvirus, complete genome                                           | PV VesGHV-1  | MF385016.1  | 60.301 | 57.101 | 62.801 | 58.001 |
| <i>Rhadinovirus</i> | <i>Ateline gammaherpesvirus 2</i>        | Herpesvirus ateles thymidylate synthase (TS) gene, complete cds                              | RhV AtGHV-2  | NC_038267.1 | 58.301 | 63.001 | 64.601 | 60.901 |
| <i>Rhadinovirus</i> | <i>Ateline gammaherpesvirus 3</i>        | Ateline herpesvirus 3 complete genome                                                        | RhV AtGHV-3  | NC_001987.1 | 58.901 | 64.801 | 64.601 | 61.501 |
| <i>Rhadinovirus</i> | <i>Bovine gammaherpesvirus 4</i>         | Bovine herpesvirus 4 long unique region, complete sequence                                   | RhV BoGHV-4  | NC_002665.1 | 60.001 | 59.401 | 60.201 | 65.801 |
| <i>Rhadinovirus</i> | <i>Cricetid gammaherpesvirus 2</i>       | Rodent herpesvirus Peru, complete genome                                                     | RhV CriGHV-2 | NC_015049.1 | 63.901 | 67.101 | 58.901 | 56.901 |
| <i>Rhadinovirus</i> | <i>Human gammaherpesvirus 8</i>          | Human herpesvirus 8 strain GK18, complete genome                                             | RhV HGHV-8   | NC_009333.1 | 62.701 | 61.801 | 56.601 | 67.701 |
| <i>Rhadinovirus</i> | <i>Macacine gammaherpesvirus 5</i>       | Macacine herpesvirus 5, genome                                                               | RhV McGHV-5  | NC_003401.1 | 66.001 | 65.001 | 56.801 | 57.801 |

Viruses shared between water buffaloes and small ruminants

|                                                                                     |                                           |                                                                                           |             |                      |         |         |         |         |
|-------------------------------------------------------------------------------------|-------------------------------------------|-------------------------------------------------------------------------------------------|-------------|----------------------|---------|---------|---------|---------|
| <i>Rhadinovirus</i>                                                                 | <i>Macacine gammaherpesvirus 8</i>        | Retroperitoneal fibromatosis-associated herpesvirus isolate RFHVMnM78114, complete genome | RhV McGHV-8 | KF703446.1           | 63.001  | 63.601  | 59.601  | 70.601  |
| <i>Rhadinovirus</i>                                                                 | <i>Macacine gammaherpesvirus 11</i>       | Macaca fuscata rhadinovirus isolate 12E2, complete genome                                 | RhV McHV-11 | JN885137.1           | 63.501  | 62.501  | 57.901  | 68.501  |
| <i>Rhadinovirus</i>                                                                 | <i>Macacine gammaherpesvirus 12</i>       | Macaca nemestrina rhadinovirus 2 strain J97167, complete genome                           | RhV McHV-12 | KP265674.2           | 65.001  | 64.401  | 55.601  | 64.501  |
| <i>Rhadinovirus</i>                                                                 | <i>Murid gammaherpesvirus 4</i>           | Murine herpesvirus 68 strain WUMS, complete genome                                        | RhV MuGHV-4 | NC_001826.2          | 61.601  | 64.601  | 66.001  | 71.401  |
| <i>Rhadinovirus</i>                                                                 | <i>Murid gammaherpesvirus 7</i>           | Wood mouse herpesvirus strain WM8, complete genome                                        | RhV MuGHV-7 | GQ169129.1           | 57.701  | 58.301  | 61.701  | 61.301  |
| <i>Rhadinovirus</i>                                                                 | <i>Saimiriine gammaherpesvirus 2</i>      | Saimiriine herpesvirus 2 complete genome                                                  | RhV SaGHV-2 | NC_001350.1          | 62.501  | 63.001  | 69.001  | 65.601  |
|                                                                                     |                                           |                                                                                           |             | Buffalo F18          | 100.001 | 91.401  | 78.101  | 62.501  |
|                                                                                     |                                           |                                                                                           |             | Goat S8              | 91.401  | 100.001 | 76.301  | 61.901  |
|                                                                                     |                                           |                                                                                           |             | Sheep F4, 15, 18     | 78.101  | 76.301  | 100.001 | 63.101  |
|                                                                                     |                                           |                                                                                           |             | Sheep F9, 11, 14, 16 | 62.501  | 61.901  | 63.101  | 100.001 |
| Not included members of genus <i>Lymphocryptovirus</i> (no Pol sequence available): |                                           |                                                                                           |             |                      |         |         |         |         |
| <i>Lymphocryptovirus</i>                                                            | <i>Cercopithecine gammaherpesvirus 14</i> |                                                                                           |             |                      |         |         |         |         |
| <i>Lymphocryptovirus</i>                                                            | <i>Gorilline gammaherpesvirus 1</i>       |                                                                                           |             |                      |         |         |         |         |
| <i>Lymphocryptovirus</i>                                                            | <i>Panine gammaherpesvirus 1</i>          |                                                                                           |             |                      |         |         |         |         |
